# Supplementary material
Source: publisher figshare collection journal article supplement (https://tandf.figshare.com/ndownloader/files/20179361)
Supplement: Supplementary file 1 [file 20179361]

**Systematics and Biodiversity**

**Unexpected systematic affinities and geographic expansion of a marine alien hydroid (Cnidaria: Hydrozoa)**

Xikun Song, Mingxin Lyu, Bernhard Ruthensteiner, Jianjun Wang, Cinzia Gravili

**Electronic supplementary material**


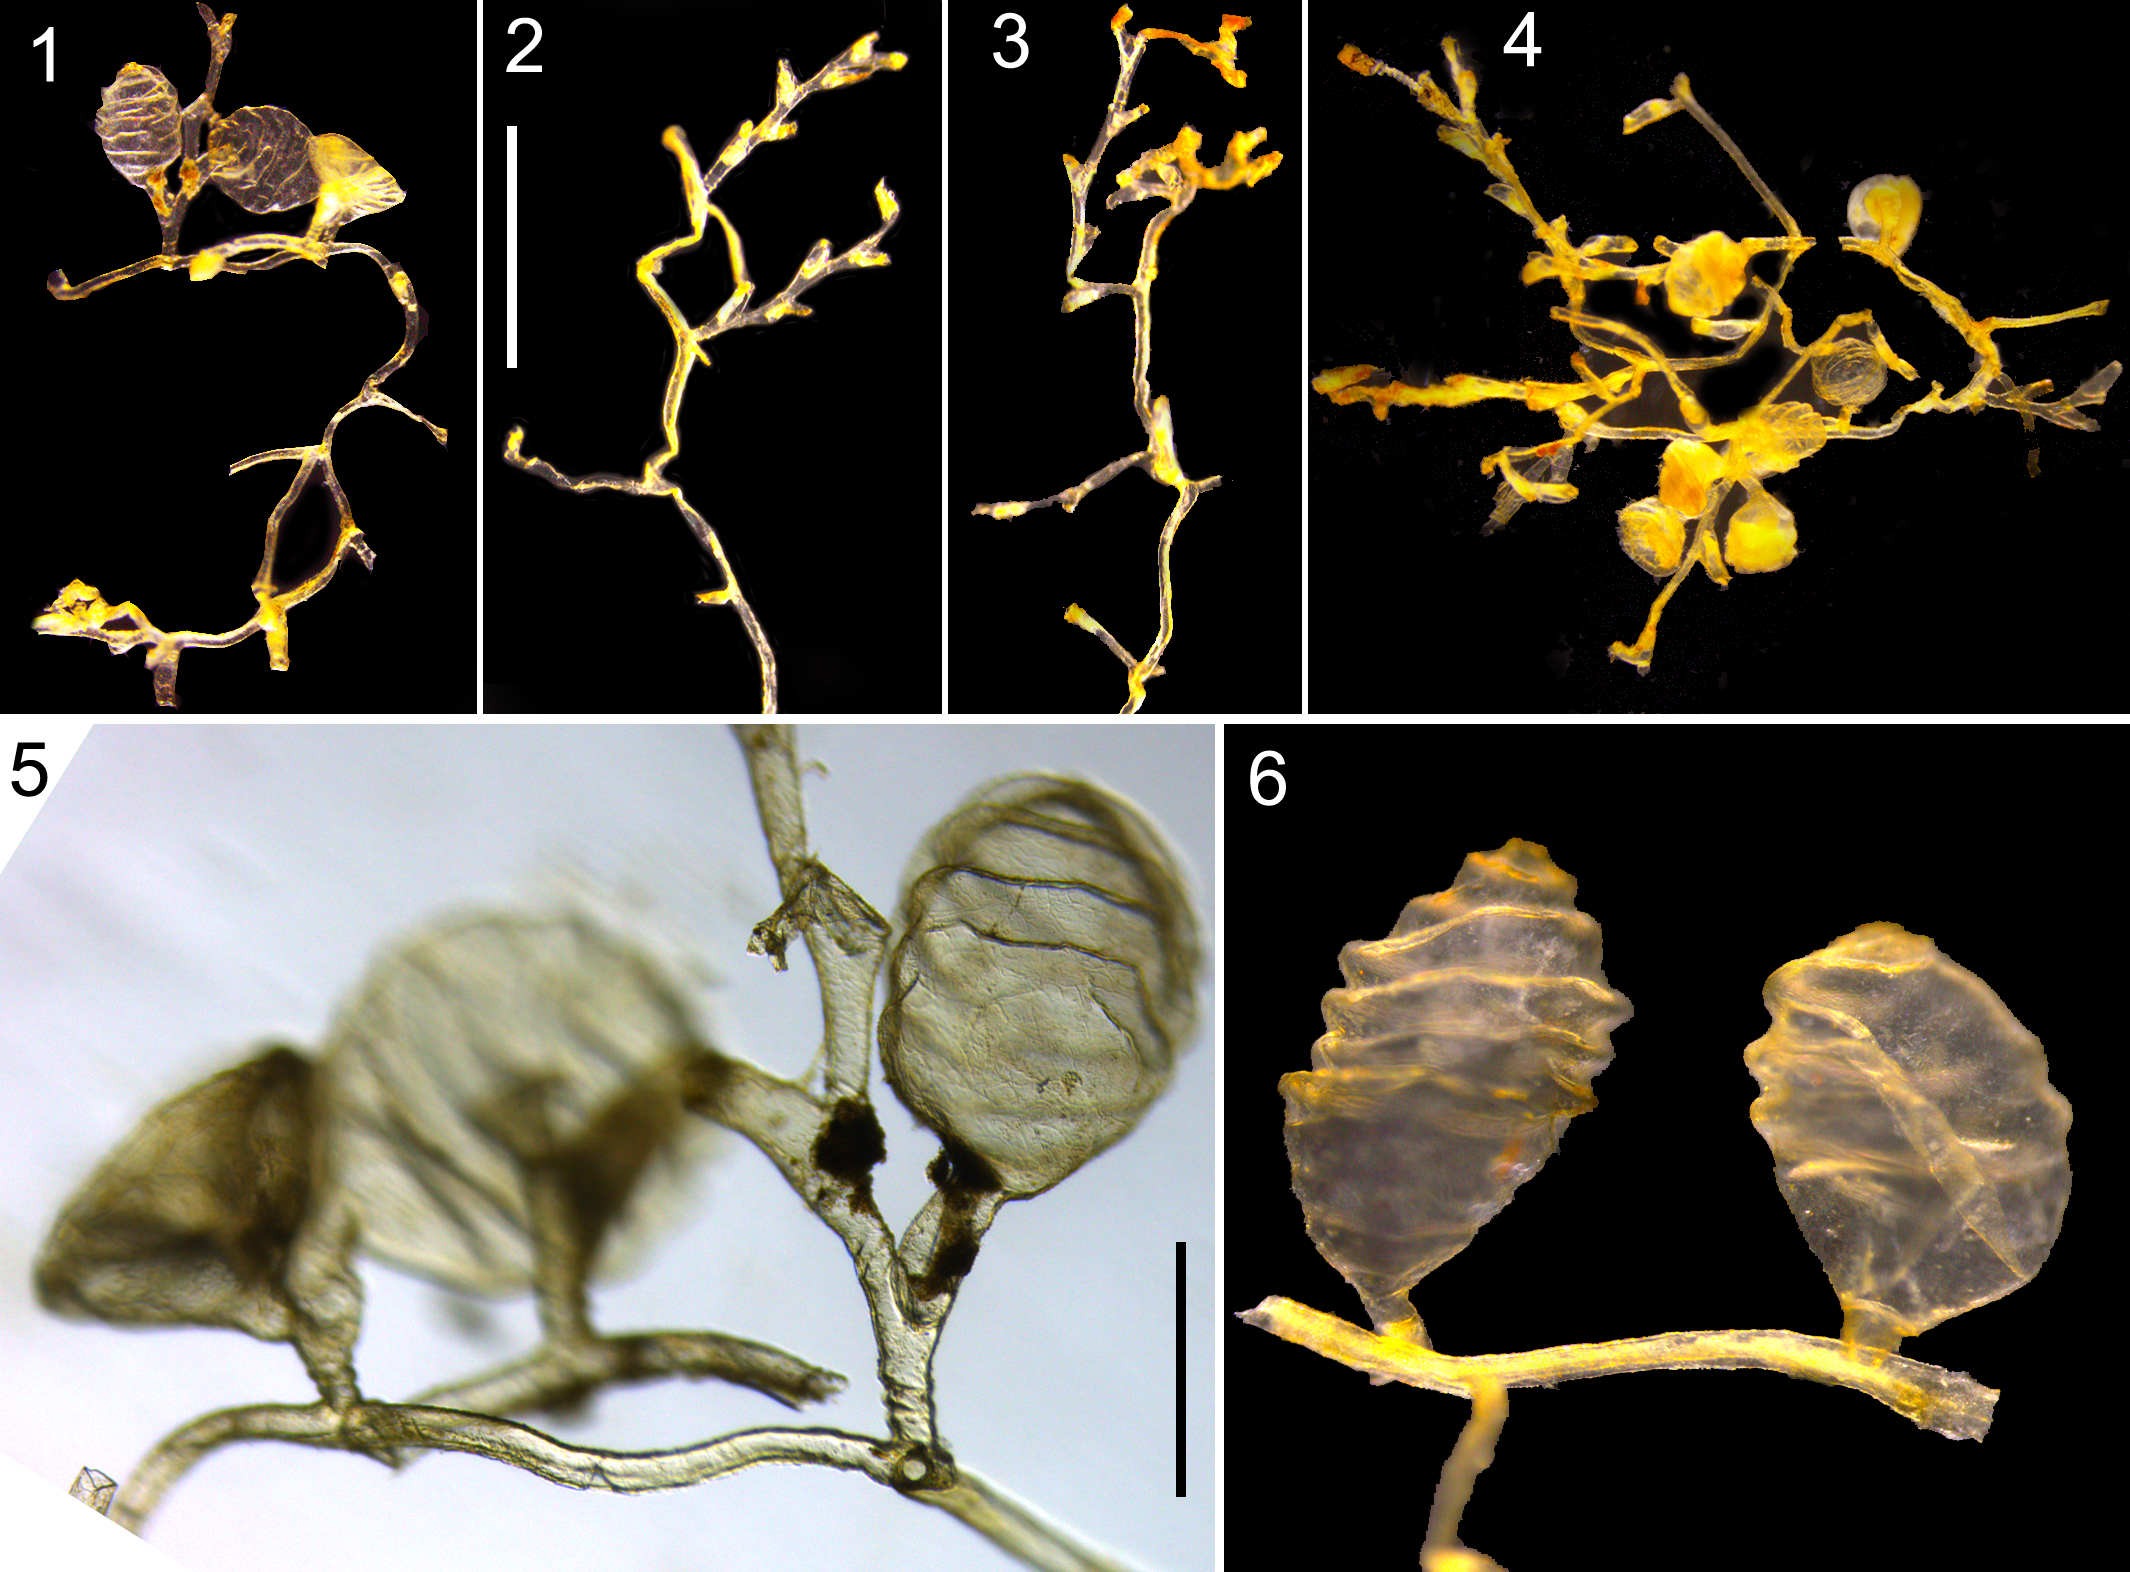


**Fig. S1.** *Bicaularia tongensis* (Stechow, 1919) comb. nov. Hydroid fragments used for DNA extraction. **(1)** XMUB000550-1; **(2)** XMUB000550-2; **(3)** XMUB000550-3; **(4)** XMUB000550-4; **(5)** XMUB000550-1, the right gonotheca arising from within hydrothecal cavity; **(6)** XMUB000550-4, two gonothecae directly originating from the surface of hydroid stalk. Scale bars: **(1–4)** 1 mm; **(5–6)** 0.25 mm.

**Fig. S2.** Phylogenetic analyses based on partial sequences of the 16S rRNA gene (483 bp after multiple sequence alignments) using TIM2+I+G model. **(1–2)**, maximum-likelihood analyses; **(3)**, Bayesian analyses. **(1)** phylogram; the scale bar represents 0.2 substitutions per site; **(2–3)**, cladograms. Numbers near the nodes indicate bootstrap or Bayesian posterior probability values. Values lower than 50 or 0.5 were omitted. Taxa in bold indicate parts of the tree for which the topology was the same in the maximum-likelihood **(1, 2)** and Bayesian trees **(3)**. Annotations of the clades I–VI are Sertulariidae *sensu stricto* Maronna *et al.* 2016, Sertularellidae, Thyroscyphidae, Symplectoscyphidae, Staurothecidae and the outgroup, respectively.


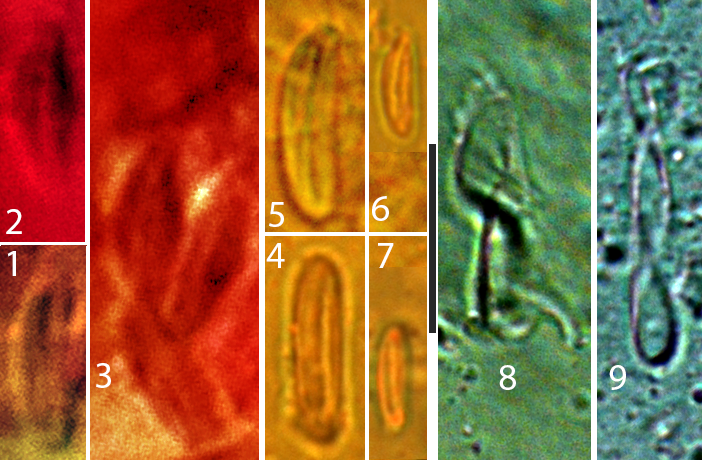


**Fig. S3.** Nematocysts of *Bicaularia tongensis* (Stechow, 1919) comb. nov. **(1–3)** ZSM20041540, paralectotype, **(3)** showing four nematocyst capsules clustered in hydroid tissue; **(4–9)** MBM280464; **(8–9)** showing two discharged nematocysts. Scale bar: 10 μm.

**Table S1.** Specimens examined in this study

| **Specimen ID** | **Type status** | **Fixation method** | **Locality** | **Latitude** | **Longitude** | **Water Depth** | **Collector** | **Collecting date** | **Morphological notes** |
| --- | --- | --- | --- | --- | --- | --- | --- | --- | --- |
| ZSM 20041539 | Lectotype | Microslide | Tonga Islands | / | / | / | / | No later than 1876 | One fragment, with six hydrothecae and one gonotheca (possibly male), with a hydrocladium arising from within the hydrothecal cavity |
| ZSM 20041540 | Paralectotype | Microslide | Tonga Islands | / | / | / | / | No later than 1876 | One fragment, with ten hydrothecae, with a hydrocladium and a gonotheca (possibly male) both arising from within the hydrothecal cavity |
| ZSM 20041541 | Paralectotype | Microslides | Tonga Islands | / | / | / | / | No later than 1876 | One fragment, 3 mm high, 10 mm wide, with creeping stolon, five stems, no hydrocladium, no gonotheca |
| MBM280462 | Non-type | Formalin fixed, ethanol stored | Guadeloupe, Caribbean Sea | 16.4537°N | 61.5355°W | 17 m | H. Galea | 2009.XI.19 | Eight colonies, two fragments, one gonotheca, sex unknown, arising from the aperture of a small tube (not a hydrotheca), with a hydrocladium arising from the aperture of hydrotheca |
| MBM280463 | Non-type | Formalin fixed, ethanol stored | Guadeloupe, Caribbean Sea | 16.4464°N | 61.5401°W | 12–15 m | H. Galea | 2009.XI.30 | Formalin fixed, ethanol stored, with a slide sample of operculum, two colonies, no gonotheca |
| MBM280464 | Non-type | Formalin fixed, ethanol stored | Martinique, Caribbean Sea | 14.8419°N | 61.2279°W | 13 m | H. Galea | 2012.II.18 | With a nematocyst slide sample, two colonies, attached to other hydroids, one gonotheca, arising from the aperture of a small tube |
| XMUB000550 | Non-type | Ethanol | Mariana Islands | 12.3868°N | 143.9512°E | 0.5 m | X. Song | 2017.VI.4 | Thirteen colonies attached to a floating Sargassaceae algae fragment, with eight gonothecae, five of them arising from the aperture of hydrothecae |
| XMUB000550-1  (DNA sample) | Non-type | Ethanol | Mariana Islands | 12.3868°N | 143.9512°E | 0.5 m | X. Song | 2017.VI.4 | With three gonothecae, two of them arising from the aperture of hydrothecae |
| XMUB000550-2  (DNA sample) | Non-type | Ethanol | Mariana Islands | 12.3868°N | 143.9512°E | 0.5 m | X. Song | 2017.VI.4 | A hydroid fragment for molecular experiment, gonotheca absent |
| XMUB000550-3  (DNA sample) | Non-type | Ethanol | Mariana Islands | 12.3868°N | 143.9512°E | 0.5 m | X. Song | 2017.VI.4 | A hydroid fragment for molecular experiment, gonotheca absent |
| XMUB000550-4  (DNA sample) | non-type | ethanol | Mariana Islands | 12.3868°N | 143.9512°E | 0.5 m | X. Song | 2017.VI.4 | A hydroid fragment for molecular experiment, with seven gonothecae, four of them arising from the aperture of hydrothecae |

**Table S2.** Information on molecular sequences used in this study

| **Species** | **Locality** | **Voucher** | **GenBank number** | **Reference** |
| --- | --- | --- | --- | --- |
| *Abietinaria abietina* | Iceland | MHNG-INVE-29946 | AY787898 (16S) | Cunningham (2004) direct submission |
|  |  |  | FJ550554 (18S) | Leclère *et al.* (2009) |
|  |  |  | FJ550411 (28S) |  |
| *Abietinaria filicula* | Iceland: Gardur | MHNG-INVE-29947 | FJ550485 (16S) |  |
|  |  |  | FJ550555 (18S) |  |
|  |  |  | FJ550412 (28S) |  |
| *Amphisbetia minima* | New Zealand: Devonport | MHNG-INVE-25071 | FJ550486 (16S) |  |
|  |  |  | FJ550556 (18S) |  |
|  |  |  | FJ550413 (28S) |  |
| *Amphisbetia operculata* | South Africa | MHNG-INVE-34014 | FJ550489 (16S) |  |
|  |  |  | FJ550561 (18S) |  |
|  |  |  | FJ550418 (28S) |  |
| *Antarctoscyphus asymmetricus* |  |  | KT824434 (16S) | Maronna *et al.* (2016) |
| *Antarctoscyphus elongatus* | Antarctica | / | FN424138 (16S) | Peña Cantero *et al.* (2010) |
| *Antarctoscyphus grandis* | Antarctica | / | FN424139 (16S) |  |
|  | Ross Sea | LEM m3X46A | KT722383 (18S) | Maronna *et al.* (2016) |
|  |  |  | KT757185 (28S) |  |
| *Antarctoscyphus spiralis* | Antarctica | lem_S151 | FN424140 (16S) | Peña Cantero *et al.* (2010) |
|  |  |  | KT722384 (18S) | Maronna *et al.* (2016) |
|  |  |  | KT757141(28S) |  |
| ***Bicaularia tongensis*** | **Mariana** | **XMUB000550-1** | **MF948613 (16S) [3]**  **MF945585 (COI) [1]**  **MF945586 (COI) [2]**  **MG763081 (18S) [4]** | **This study** |
|  |  | **XMUB000550-2** | **MF948613 (16S) [3]**  **MF945586 (COI) [2]** |  |
|  |  | **XMUB000550-3** | **MF948613 (16S) [1]**  **MF945585 (COI) [1]** |  |
|  |  | **XMUB000550-4** | **MG001906 (28S) [1]** |  |
| *Clytia hemisphaerica* | North Sea | / | AY789814 (16S) | Govindarajan *et al.* (2006) |
|  |  |  | FJ550601 (18S) | Leclère *et al.* (2009) |
|  |  |  | FJ550457 (28S) |  |
| *Diphasia fallax* | Iceland | MHNG-INVE-29950 | AY787901 (16S) | Cunningham (2004) direct submission |
|  |  |  | FJ550557 (18S) | Leclère *et al.* (2009) |
|  |  |  | FJ550414 (28S) |  |
| *Dynamena crisioides* | Brazil | MZUSP: 1679 | KT266609 (16S) | Maronna *et al.* (2016) |
|  |  |  | KT722391 (18S) |  |
|  |  |  | KT757177 (28S) |  |
| *Dynamena moluccana* | Indonesia | / | FJ550494 (16S) | Leclère *et al.* (2009) |
|  |  |  | FJ550563 (18S) |  |
|  |  |  | FJ550429 (28S) |  |
| *Fraseroscyphus hozawai* | Qingdao, China | MBM280006 | KT190714 (16S) | Song *et al.* (2016b) |
|  |  |  | KT190766 (18S) |  |
|  |  |  | KT190773 (28S) |  |
| *Hydrallmania falcata* | Plymouth UK | / | AM888325 (16S) | Moura *et al.* (2008) |
|  | Iceland | MHNG-INVE-29948 | FJ550559 (18S) | Leclère *et al.* (2009) |
|  |  |  | FJ550416 (28S) |  |
| *Halecium beanii* | South Africa | MHNG-INVE-34009 | FJ550488 (16S) |  |
|  |  |  | FJ550560 (18S) |  |
|  |  |  | FJ550417 (28S) |  |
| *Halecium halecinum* | USA | MZUSP:1782 | KT266617 (16S) | Maronna *et al.* (2016) |
|  |  |  | KT722399 (18S) |  |
|  |  |  | KT757152 (28S) |  |
| *Halecium labrosum* | Iceland | MHNG-INVE-29030 | AY787916 (16S) | Cunningham (2004) direct submission |
|  |  |  | FJ550550 (18S) | Leclère *et al.* (2009) |
|  |  |  | FJ550407 (28S) |  |
| *Halecium lenticulare* | New Zealand | MHNG-INVE-33461 | FJ550469 (16S) |  |
|  |  |  | FJ550532 (18S) |  |
|  |  |  | FJ550387 (28S) |  |
| *Halecium pusillum* | France | MHNG-INVE-36295 | FJ550499 (16S) |  |
|  |  |  | FJ550580 (18S) |  |
|  |  |  | FJ550437 (28S) |  |
| *Idiellana pristis* | Brazil | MZUSP: 1651 | KT266622 (16S) | Maronna *et al.* (2016) |
|  |  |  | KT722404 (18S) |  |
|  |  |  | KT757193 (28S) |  |
| *Salacia desmoides* | Portugal | / | FJ550464 (16S) | Leclère *et al.* (2009) |
|  |  |  | FJ550528 (18S) |  |
|  |  |  | FJ550381 (28S) |  |
| *Sertularella africana* | South Africa | MHNG-INVE-34017 | FJ550490 (16S) |  |
|  |  |  | FJ550563 (18S) |  |
|  |  |  | FJ550420 (28S) |  |
| *Sertularella* cf. *fusiformis* 1 | Lido, Funchal naval club, Madeira | / | JF898041 (16S) | Moura *et al.* (2011) |
| *Sertularella* cf. *fusiformis* 2 | Azores, Boca Caldeirinhas | / | JF898050 (16S) |  |
| *Sertularella* cf. *mediterranea* | Off Viana do Castelo, NW Portugal | / | JF898028 (16S) |  |
| *Sertularella* cf. *unituba* | Azores Bank, Azores | / | JF898045 (16S) |  |
| *Sertularella diaphana* | Cidade de Maceio:Alagoas | MZUSP: 1725 | KT266639 (16S) | Maronna *et al.* (2016) |
|  |  |  | KT722430 (18S) |  |
|  |  |  | KT757131 (28S) |  |
| *Sertularella ellisii* | Mallorca, Spain | MHNG-INVE-32156 | FJ550478 (16S) | Leclère *et al.* (2009) |
|  |  |  | FJ550545 (18S) |  |
|  |  |  | FJ550402 (28S) |  |
| *Sertularella gayi* | Morocco: Mercator mud volcano, Gulf of Cadiz, NE Atlantic | / | AM888340 (16S) | Moura *et al.* (2008) |
|  | France: Roscoff | MHNG-INVE-36302 | FJ550579 (18S) | Leclère *et al.* (2009) |
|  |  |  | FJ550436 (28S) |  |
| *Sertularella mediterranea* | Banyuls-sur-Me, France | MHNG-INVE-32948 | FJ550479 (16S) |  |
|  |  |  | FJ550546 (18S) |  |
|  |  |  | FJ550403 (28S) |  |
| *Sertularella ornata* | Estelas Bxa Alagada, W Portugal | / | JF898051 (16S) | Moura *et al.* (2011) |
|  | Berlengas, Rinchao, W Portugal | / | JF898052 (16S) |  |
| *Sertularella perpusilla* | Spain, Cala Murada, Mallorca | MHNG-INVE-29765 | AY787894 (16S) | Cunningham (2004) direct submission |
|  |  |  | EU305532 (28S) | Cartwright *et al.* 2008 |
| *Sertularella polyzonias* | Plymouth, UK | / | JF898025 (16S) | Moura *et al.* (2011) |
| *Sertularella robusta* | Morocco: Pen Duick Escarpment, Gulf of Cadiz, NE Atlantic | / | AM888339 (16S) | Moura *et al.* (2008) |
| *Sertularella rugosa* | Iceland: Sandgerdi & Gardur | MHNG-INVE-29032 | AY787906 (16S) | Cunningham (2004) direct submission |
| *Sertularella sanmatiasensis* | Antarctica, Low Island | / | FN424141 (16S) | Peña Cantero *et al.* (2010) |
|  | Antarctica | LEM m3XS158 | KT722431 (18S) | Maronna *et al.* (2016) |
|  |  |  | KT757202 (28S) |  |
| *Sertularella simplex* | Otago, Surat Bay, New Zealand | MHNG-INVE-91078 | KX355446 (16S) | Schuchert (2016) direct submission |
| *Sertularella* sp. | Flores Island, Azores | / | JF898048 (16S) | Moura *et al.* (2011) |
| *Sertularelloides cylindritheca* | Praia do Frances, Marechal Deodoro, Alagoas, Brazil | MZUSP: 1677 | KT266640 (16S) | Maronna *et al.* (2016) |
|  |  |  | KT722433 (18S) |  |
| *Sertularia argentea* | France: Roscoff |  | FJ550461 (16S) | Leclère *et al.* (2009) |
|  |  |  | FJ550520 (18S) |  |
|  |  |  | FJ550373 (28S) |  |
| *Sertularia cupressina* | Iceland | MHNG-INVE-29949 | FJ550475 (16S) |  |
|  |  |  | FJ550539 (18S) |  |
|  |  |  | FJ550395 (28S) |  |
| *Sertularia distans* | Brazil | MZUSP: 1705 | KT266641 (16S) | Maronna *et al.* (2016) |
|  |  |  | KT722434 (18S) |  |
|  |  |  | KT757163 (28S) |  |
| *Sertularia marginata* | Brazil | MZUSP: 1656 | KT266642 (16S) |  |
|  |  |  | KT722435 (18S) |  |
|  |  |  | KT757150 (28S) |  |
| *Sertularia tumida* | Brazil | MZUSP: 4200 | KT266643 (16S) |  |
|  |  |  | KT722436 (18S) |  |
|  |  |  | KT757154 (28S) |  |
| *Sertularia turbinata* | Brazil | MZUSP: 1704 | KT266644 (16S) |  |
|  |  |  | KT722437 (18S) |  |
|  |  |  | KT757147 (28S) |  |
| *Staurotheca antarctica* | Antarctic | lem_S155 | FN424142 (16S) | Peña Cantero *et al.* (2010) |
|  |  |  | KT722438 (18S) | Maronna *et al.* (2016) |
|  |  |  | KT757203 (28S) |  |
| *Staurotheca nonscripta* | Antarctica | / | FN424144 (16S) | Peña Cantero *et al.* (2010) |
| *Symplectoscyphus exochus* | Antarctica | lem_S123 | FN424147 (16S) |  |
|  |  |  | KT722440 (18S) | Maronna *et al.* (2016) |
|  |  |  | KT757172 (28S) |  |
| *Symplectoscyphus glacialis* | Antarctica | lem_S153 | FN424148 (16S) | Peña Cantero *et al.* (2010) |
|  |  |  | KT722441 (18S) | Maronna *et al.* (2016) |
|  |  |  | KT757178 (28S) |  |
| *Symplectoscyphus liouvillei* | Antarctica | / | FN424149 (16S) | Peña Cantero *et al.* (2010) |
| *Symplectoscyphus plectilis* | Antarctica | / | FN424150 (16S) |  |
| *Symplectoscyphus* sp. | Antarctica | / | FN424151 (16S) |  |
| *Symplectoscyphus tricuspidatus* | Bering Sea | MBM240558 | KT190741 (16S) | Song *et al.* (2016b) |
|  |  |  | KT190771 (18S) |  |
|  |  |  | KT190775 (28S) |  |
| *Thuiaria thuja* | Iceland | MHNG-INVE-29951 | AY787908 (16S) | Cunningham (2004) direct submission |
|  |  |  | EU305503 (18S) | Cartwright *et al.* (2008) |
|  |  |  | EU305536 (28S) |  |
| *Thyroscyphus marginatus* | Honduras | MHNG-INVE-35477 | FJ550495 (16S) | Leclère *et al.* (2009) |
|  |  |  | FJ550573 (18S) |  |
|  |  |  | FJ550430 (28S) |  |
| *Thyroscyphus ramosus* | Brazil | MZUSP: 1664 | KM822774 (16S) | Maronna *et al.* (2016) |
|  |  |  | KM822775 (18S) |  |
|  |  |  | KM822776 (28S) |  |
| *Xingyurella turgida* | California | MHNG-INVE-29467 | FJ550462 (16S) | Leclère *et al.* (2009) |
|  |  |  | FJ550524 (18S) |  |
|  |  |  | FJ550377 (28S) |  |
| *Xingyurella xingyuarum* | Yellow Sea | MBM280254 | MF135581 (16S) | Song *et al.* (2018) |
|  |  |  | MG763073 (18S) |  |
|  |  | MBM280259 | MG763080 (28S) |  |

Notes: MBM = Marine Biological Museum of Chinese Academy of Sciences, Institute of Oceanology, CAS; MHNG = Muséum d'histoire naturelle de la Ville de Genève; MZUSP = Museu de Zoologia da Universidade de São Paulo

The superscript numbers for *Bicaularia tongensis* indicate the numbers of the haplotype replicates picked up for each hydroid fragment during the molecular cloning experiments. See references below.

**Table S3.** Morphological comparisons of selected species

| Nominal Species | I | Branching pattern | | | | Hydrotheca | | | | | | | | | | Gonotheca | | | R |
| --- | --- | --- | --- | --- | --- | --- | --- | --- | --- | --- | --- | --- | --- | --- | --- | --- | --- | --- | --- |
| B1 | B2 | B3 | B4 | H1 | H2 | H3 | H4 | H5 | H6 | H7 | H8 | H9 | H10 | G1 | G2 | G3 |
| *■Bicaularia tongensis* | 0 | 1 | 0 | 0 | 0 | 0 | 2 | 0 | 0 | 2 | 2 | 1 | 1 | 2 | 2 | 2 | 0 | 1 | 1 |
| ▲■*Thyroscyphus ramosus* | 0 | 1 | 1 | 1 | 0 | 1 | 4 | 1 | 1 | 2 | 4 | 2 | 2 | 0 | 0 | 0 | 0 | 0 | 2 |
| ▲■*Sertularella polyzonias* | 0 | 1 | 0 | 1 | 0 | 0 | 4 | 1 | 1 | 2 | 4 | 2 | 2 | 0 | 0 | 1 | 1 | 1 | 3 |
| ▲*Sertularella mirabilis* | 0 | 1 | 0 | 1 | 1 | 0 | 4 | 1 | 1 | 2 | 4 | 2 | 2 | 0 | 0 | 2 | 1 | 1 | 4 |
| ▲*Sertularella rugosa* | 0 | 0/1 | 0 | 0 | 0 | 0 | 4 | 1 | 1 | 2 | 4 | 2 | 2 | 0 | 0 | 2 | 1 | 1 | 5 |
| ▲*Xingyurella turgida* | 0 | 0/1 | 0 | 1 | 0 | 0 | 3 | 1 | 2 | 0 | 3 | 2 | 1 | 0 | 0 | 4 | 1 | 1 | 6 |
| ■*Symplectoscyphus johnstoni* | 0 | 1 | 1 | 1 | 1 | 0 | 3 | 1 | 2 | 0 | 3 | 2 | 1 | 0 | 0 | 2 | 0 | 1 | 7 |
| ▲*Symplectoscyphus tricuspidatus* | 0 | 1 | 1 | 1 | 1 | 0 | 3 | 1 | 2 | 0 | 3 | 2 | 1 | 0 | 0 | 2 | 0 | 1 | 8 |
| ▲■*Antarctoscyphus elongatus* | 0 | 1 | 1 | 1 | 1 | 0 | 3 | 1 | 2 | 0 | 3 | 2 | 1 | 0 | 0 | 0 | 0 | 0 | 9 |
| ▲■*Fraseroscyphus hozawai* | 0 | 0/1 | 0 | 0 | 0 | 0 | 3 | 1 | 2 | 0 | 3 | 2 | 1 | 0 | 0 | 0 | 0 | 1 | 10 |
| ▲■*Sertularia argentea* | 0 | 1 | 1 | 1 | 1 | 0 | 2 | 0 | 0 | 2 | 2 | 1 | 1 | 0 | 0 | 0 | 1 | 1 | 11 |
| ▲*Sertularia plumosa* | 0 | 1 | 1 | 1 | 1 | 0 | 2 | 0 | 0 | 2 | 2 | 1 | 1 | 0 | 0 | 0 | 1 | 1 | 12 |
| ▲*Abietinaria pulchra* | 0 | 1 | 1 | 1 | 1 | 0 | 0 | 0 | 0 | 0 | 1 | 1 | 0 | 0 | 0 | 0 | 1 | 1 | 13 |
| ▲*Sertularia* cf. *cupressoides* | 0 | 1 | 1 | 0 | 0 | 0 | 2 | 0 | 0 | 2 | 2 | 1 | 1 | 0 | 0 | 0 | 1 | 1 | 14 |
| ▲*Sertularia xuelongi* | 0 | 1 | 1 | 1 | 1 | 0 | 2 | 0 | 0 | 2 | 2 | 1 | 1 | 0 | 0 | 0 | 0 | 1 | 15 |
| ▲*Sertularia robusta* | 0 | 1 | 1 | 1 | 1 | 0 | 2 | 0 | 0 | 2 | 2 | 1 | 1 | 0 | 0 | 0 | 1 | 1 | 16 |
| ▲■*Idiellana pristis* | 0 | 1 | 1 | 1 | 0 | 0 | 2 | 0 | 0 | 2 | 1 | 1 | 0 | 2 | 1 | 3 | 0 | 1 | 17 |
| ■*Papilionella spasskii* | 0 | 1 | ? | ? | 0 | 0 | 0 | 0 | 0 | 0 | 3 | 1 | 0 | 1 | 1 | 2 | 0 | 1 | 18 |
| ▲■*Dynamena pumila* | 1 | 1 | 1 | 1 | 0 | 0 | 3 | 2 | 1 | 0 | 2 | 1 | 1 | ? | ? | 1 | 0 | 1 | 19 |
| *D. bilamellata* | 1 | 0 | 0 | 0 | 0 | 0 | 3 | 1 | 0 | 2 | 2 | 1 | 1 | 1 | 1 | ? | ? | ? | 20 |
| *D. disticha* | 1 | 1 | 1 | 1 | 0 | 0 | 3 | 1 | 0 | 2 | 2 | 1 | 1 | 1 | 1 | 2 | 0 | 1 | 21 |
| *D. crisioides* | 1 | 1 | 1 | 1 | 0 | 0 | 3 | 1 | 0 | 2 | 2 | 1 | 1 | 1 | 1 | 0 | 0 | 1 | 22 |
| *D. decipiens* | 1 | 1 | ? | ? | 0 | 0 | 3 | 1 | 0 | 2 | 2 | 1 | 1 | 1 | 1 | ? | ? | ? | 23 |
| *Sertularia marginata* | 1 | 1 | 1 | 1 | 0 | 0 | 3 | 1 | 0 | 2 | 2 | 1 | 1 | 1 | 1 | 2 | 1 | 1 | 24 |
| *Sertularia mertoni* | 1 | 1 | 1 | 1 | 0 | 0 | 3 | 1 | 0 | 2 | 2 | 1 | 1 | 1 | 1 | 0 | 0 | 1 | 25 |
| *Sertularia vervoorti* | 1 | 0 | 0 | 0 | 0 | 0 | 3 | 1 | 0 | 2 | 2 | 1 | 1 | 1 | 1 | 2 | 0 | 1 | 26 |
| *Sertularia malayensis* | 1 | 0 | 0 | 0 | 0 | 0 | 2 | 0 | 0 | 2 | 2 | 1 | 1 | 1 | 1 | 0 | 0 | 1 | 27 |

See statistics for species of Sertulariidae with the character of "gonothecae or hydrocladia origin from within the hydrothecal cavity" in Song *et al.* (2016b).

▲ Species with partial sequences of the 16S rRNA and/or COI gene.

■ Type species.

**Abbreviations and codes for morphological characters:**

**Internode hinge-joint (I):** internodes of hydroculus or hydrocladium with (1) or without (0) hinge-joint; **Branching pattern (B):** B1, with (1) or without (0) hydrocladium; B2, with (1) or without (0) branching hydrocladial apophysis; B3, with (1) or without (0) axillary hydrotheca; B4, with (1) or without (0) repeated dichotomous branchlets; **Hydrotheca (H):** H1, hydrotheca pedicellate (1) or not pedicellate (0); H2, number of hydrothecal marginal cusps; H3, number of hydrothecal adcauline marginal cusps; H4, number of hydrothecal abcauline marginal cusps; H5, number of hydrothecal lateral cusps; H6, number of operculum valves; H7, number of adcauline operculum valves; H8, number of abcauline operculum valves; H9, fold on the operculum valve, without fold (0), only the adcauline valve (1) or each valve (2) with a fold; H10, total number of folds; **Gonotheca (G)**: G1, matured gonothecal surface smooth (0), with fine transversal ridges, undulates or grooves (1), with deep transversal undulates, grooves or ridges (2); with longitudinal ridges (3), gonotheca surface (the apical region excluded) with spines (4); G2, with (1) or without (0) apical spines or horns; G3, with (1) or without (0) short distal neck; **References / data resources (R):** 1, See Systematics; 2, Allman (1877), Shimabukuro & Marques (2006), Galea (2008); 3, Cornelius (1995), Schuchert (2001); 4, Hirohito (1995), Song (2016); 5, Naumov (1960), Cornelius (1995), Schuchert (2001), Song (2016); 6, Trask (1857), Song (2016); 7, Hartlaub (1901), Ralph (1961); 8, Naumov (1960), Schuchert (2001), Song (2016); 9, Peña Cantero, Svoboda & Vervoort (1999), Song (2016); 10, Song (2016), Song *et al.* (2016b); 11, Cornelius (1995), Song (2016); 12, Clark (1877), Song (2016); 13, Nutting (1904), Naumov (1960), Song (2016); 14, Song (2016); 15, Song (2016), Song *et al.* (2016a); 16, Clark (1877), Naumov (1960), Song (2016); 17, Hirohito (1995), Song (2016); 18, Fenyuk (1947), Naumov (1960), Antsulevich and Vervoort (1993); 19, Naumov (1960), Cornelius (1995), Schuchert (2001), Bouillon *et al.* (2006); 20, Watson (2000); 21, Billard (1925), Vervoort (1941, 1967), as *Dynamena cornicina*; 22, Vervoort (1968), Hirohito (1995), Song (2016); 23, Levinsen (1913); 24, Vervoort (1968) as *Sertularia inflata*; 25, Watson (2000); 26, Migotto & Calder (1998); 27, Billard (1925), Vervoort & Vasseur (1977), Hirohito (1995). **References (R):** See below.

**Table S4.** Records of species of the family Sertulariidae with folded opercular valves

| Nominal Species | Number of | | Records |
| --- | --- | --- | --- |
| valves | folded valves |
| *Bicaularia tongensis* (Stechow, 1919) | 2 | 2 | Morri *et al.* (2009) as *Sertularia thecocarpa*, Galea (2010) as *Sertularia tongensis* |
| *Dynamena bilamellata* Watson, 2000 | 2 | 1 (adcauline) | Watson (2000) |
| *D. disticha* (Bosc, 1802) | 2 | 1 (adcauline) | Billard (1925), Vervoort (1941, 1967) as *Dynamena cornicina* |
| *D. crisioides* Lamouroux, 1824 | 2 | 1 (adcauline) | Vervoort (1968), Song (2016) |
| *D. decipiens* (Levinsen, 1913) | 2 | 1 (adcauline) | Levinsen (1913) |
| *Sertularia marginata* (Kirchenpauer, 1864) | 2 | 1 (adcauline) | Vervoort (1968) as *Sertularia inflata* |
| *Sertularia mertoni* (Stechow & Muller, 1923) | 2 | 1 (adcauline) | Watson (2000) as *Dynamena mertoni* |
| *Sertularia vervoorti* Migotto & Calder, 1998 | 2 | 1 (adcauline) | Migotto & Calder (1998) |
| *Idiellana pristis* (Lamouroux, 1816) | 1 | 1 | Hirohito (1995), Song (2016) |
| *Papilionella spasskii* (Fenyuk, 1947) | 1 | 1(adcauline) | Antsulevich & Vervoort (1993), Bouillon *et al.* (2006) |
| *Sertularia malayensis* Billard, 1924 | 2 | 1 (adculine) | Billard (1925), Vervoort & Vasseur (1977) |

**References**

Allman, G.J. (1877). Report on the Hydroida collected during the Exploration of the Gulf Stream by L. F. de Pourtalès, Assistant United States Coast Survey. *Memoirs of the Museum of Comparative Zoology, 5*, 1–66.

Antsulevich, A. E., & Vervoort, W., (1993). Some little-known species of hydroids (Cnidaria: Hydrozoa: Lafoeidae) and description of *Papilionella pterophora* gen. nov., spec. nov. (Sertulariidae). *Zoologische Mededelingen, Leiden, 67*,431–443.

Billard, A. (1925). Les Hydroides de l'Expedition du Siboga. II. Synthecidae et Sertularidae. *Siboga Expeditie, 7*, 1–232.

Bouillon, J., Gravili, C., Pages, F., Gili, J. M., & Boero, F. (2006). An introduction to Hydrozoa. *Memoires du Museum National D'Histoire Naturelle, 194*, 1–591.

Cartwright, P., Evans N. M., Dunn C. W., Marques A. C., Miglietta M. P., Schuchert P., & Collins A. G. (2008). Phylogenetics of Hydroidolina (Hydrozoa: Cnidaria). *Journal of the Marine Biological Association of the United Kingdom, 88*, 1663–1672.

Clark, S.F. (1877). Report on the hydroids collected on the coast of Alaska and the Aleutian Islands by W.H. Dall, U.S. Coast Survey, and party, from 1871 to 1874 inclusive. *Proceedings of the Academy of Natural Sciences of Philadelphia, 28*, 209–238.

Cornelius, P.F.S. (1995). North-west European thecate hydroids and their medusae. Part 2. Sertulariidae to Campanulariidae. *Synopses of the British Fauna, New Series, 50*, 1–386.

Fenyuk, V. (1947). Some materials on the hydroids (Thecaphora) from the Ochotsk Sea. *Byulleten' Moskovskogo Obshchestva Ispytatelei Prirody n. ser, 52*, 3–13.

Galea, H. R. (2010). Additional shallow-water thecate hydroids (Cnidaria: Hydrozoa) from Guadeloupe and Les Saintes, French Lesser Antilles. *Zootaxa, 2570*, 1–40.

Galea, H.R. (2008). On a collection of shallow-water hydroids (Cnidaria: Hydrozoa) from Guadeloupe and Les Saintes, French Lesser Antilles. *Zootaxa, 1878*, 1–54.

Govindarajan, A. F., Boero, F., & Halanych, K. M. (2006). Phylogenetic analysis with multiple markers indicates repeated loss of the adult medusa stage in Campanulariidae (Hydrozoa, Cnidaria). *Molecular Phylogenetics and Evolution, 38*, 820–834.

Hartlaub, C. (1901). Revision der *Sertularella* Arten. *Abhandlungen aus dem Gebiete der Naturwissenschaften, Naturwissenschaftlicher Verein in Hamburg, 16*, 1–143.

Hirohito, Emperor of Japan. (1995). *The hydroids of Sagami Bay II. Thecata.* Tokyo: Biological Laboratory of the Imperial Household.

Leclère, L., Schuchert, P., Cruaud, C., Couloux, A., & Manuel, M. (2009). Molecular phylogenetics of Thecata (Hydrozoa, Cnidaria) reveals long-term maintenance of life history traits despite high frequency of recent character changes. *Systematic Biology, 58*, 509–526.

Levinsen, G.M.R. (1913). Systematic Studies on the Sertulariidae. *Videnskabelige Meddelelser fra dansk Naturhistorisk Forening, 64*, 249–323.

Maronna, M. M., Miranda, T. P., Peña Cantero, A. L., Barbeitos, M. S., & Marques, A. C. (2016). Towards a phylogenetic classification of Leptothecata (Cnidaria, Hydrozoa). *Scientific Reports*, 6, 18075

Migotto, A. E., & Calder, D. R. (1998). *Sertularia vervoorti* (Hydrozoa: Sertulariidae), an undescribed species of hydroid from Brazil. *Zoologische Mededelingen, Leiden, 323*, 169–174.

Morri, C., Puce, S., Bianchi, C. N., Bitar, G., Zibrowius, H., & Bavestrello, G. (2009). Hydroids (Cnidaria: Hydrozoa) from the Levant Sea (mainly Lebanon), with emphasis on alien species. *Journal of the Marine Biological Association of the United Kingdom, 89*, 49–62.

Moura, C. J., Cunha, M. R., Porteiro, F. M., & Rogers, A. D. (2011). The use of the DNA barcode gene 16S mRNA for the clarification of taxonomic problems within the family Sertulariidae (Cnidaria, Hydrozoa). *Zoologica Scripta, 40*, 520–537.

Moura, C. J., Harris, D. J., Cunha, M. R., & Rogers, A. D. (2008). DNA barcoding reveals cryptic diversity in marine hydroids (Cnidaria, Hydrozoa) from coastal and deep-sea environments. *Zoologica Scripta, 37*, 93–108.

Naumov, D.V. (1960). *Hydroids and Hydromedusae of the marine, brackish and freshwater basins of the U.S.S.R.* Opredeliteli po Faune SSSR 70. Academia Nauk Pablishes, Moskwa-Leningrad, 626 pp.

Nutting, C.C. (1904). American hydroids. Part II. The Sertularidae. *Bulletin of the American Museum of Natural History, 4*, 1–151.

Peña Cantero, A. L., Sentandreu, V., & Latorre, A. (2010). Phylogenetic relationships of the endemic Antarctic benthic hydroids (Cnidaria, Hydrozoa): what does the mitochondrial 16S rRNA tell us about it? *Polar Biology, 33*, 41–57.

Peña Cantero, Á.L., Svoboda, A., Vervoort, W. (1999). Species of *Antarctoscyphus* Peña Cantero, García Carrascosa and Vervoort, 1997 (Cnidaria, Hydrozoa, Sertulariidae) from recent Antarctic expeditions with R.V. Polarstern, with the description of two new species. *Journal of Natural History, 33*, 1739–1765.

Ralph, P.M. (1961). New Zealand thecate hydroids. Part III.–Family Sertulariidae. *Transactions and Proceedings of the Royal Society of New Zealand, 88*, 749–838.

Schuchert, P. (2001). Hydroids of Greenland and Iceland (Cnidaria, Hydrozoa). *Meddelelser om Grønland, Bioscience,* *53,* 1–184.

Shimabukuro, V., Marques, A.C. (2006). Morphometrical analysis, histology, and taxonomy of *Thyroscyphus ramosus* (Cnidaria, Hydrozoa) from the coast of Brazil. *Zootaxa, 1184*, 29–42.

Song, X. (2016). *Diversity and evolution of Sertulariidae Lamouroux, 1812 (Cnidaria: Hydrozoa) in China, with records from Chinese Arctic and Antarctic National Research Expeditions* (Doctoral dissertation), University of Chinese Academy of Sciences, Beijing, and Institute of Oceanology, Chinese Academy of Sciences, Qingdao, Shandong.

Song, X., Gravili, C., Ruthensteiner, B., Lyu, M., & Wang, J. (2018). Incongruent cladistics reveal a new hydrozoan genus (Cnidaria: Sertularellidae) endemic to the eastern and western coasts of the North Pacific Ocean. *Invertebrate Systematics*, 32, 1083–1101.

Song, X., Gravili, C., Wang, J., Deng, Y., Wang, Y., Fang, L., Lin, H., Wang, S., Zheng, Y., & Lin, J. (2016a). A new deep-sea hydroid (Cnidaria: Hydrozoa) from the Bering Sea Basin reveals high genetic relevance to Arctic and adjacent shallow-water species. *Polar Biology,* 39, 461–471.

Song, X., Xiao, Z., Gravili, C., Ruthensteiner, B., Mackenzie, M., Wang, S., … & Wang, J. (2016b). Worldwide revision of the genus *Fraseroscyphus* Boero and Bouillon, 1993 (Cnidaria: Hydrozoa): an integrative approach to establish new generic diagnoses. *Zootaxa, 4168*, 1–37.

Trask, J.B. (1857). On nine new species of zoophytes from the Bay of San Francisco and adjacent localities. *Proceedings of the California Academy of Sciences, 1*, 112–115.

Vervoort, W. (1941). The Hydroida of the Snellius Expedition (Milleporidae and Stylasteridae excluded). *Biological results of the Snellius Expedition XI. Temminckia, 6*, 186–240.

Vervoort, W. (1967). The Hydroida and Chondrophora of the Israel South Red Sea Expedition. *Israel South Red Sea Expedition Reports,* *25*, 18–54.

Vervoort, W. (1968). Report on a collection of Hydroida from the Caribbean region, including an annotated checklist of Caribbean hydroids. *Zoologische Mededelingen, Leiden, 92*, 1–124.

Vervoort, W., & Vasseur, P. (1977). Hydroids from French Polynesia with notes on distribution and ecology. *Zoologische Mededelingen, Leiden, 159*, 1–98.

Watson, J. E. (2000). Hydroids (Hydrozoa: Leptothecatae) from the Beagle Gulf and Darwin Harbour, northern Australia. *The Beagle, Records of the Museums and Art Galleries of the Northern Territory, 16*, 1–82.
